# Supplementary material
Source: ML conference proceedings conference paper supplement (https://openreview.net/forum?id=rAjHUNXybH)

Loss over time (6 seeds)

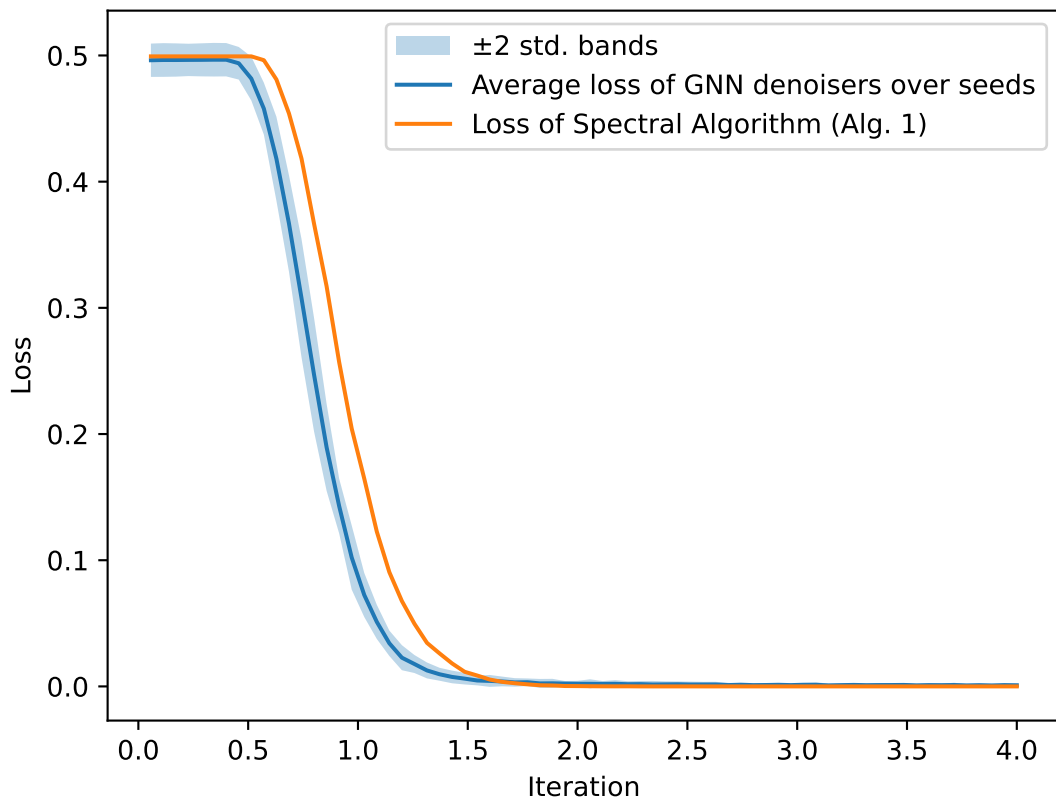

Supplement: supplementary_material [file robust_plot-checkpoint.pdf › SparseDiffusion-main/images/.ipynb_checkpoints/robust_plot-checkpoint.pdf]
