# Supplementary material
Source: ML conference proceedings conference paper supplement (https://openreview.net/forum?id=rAjHUNXybH)

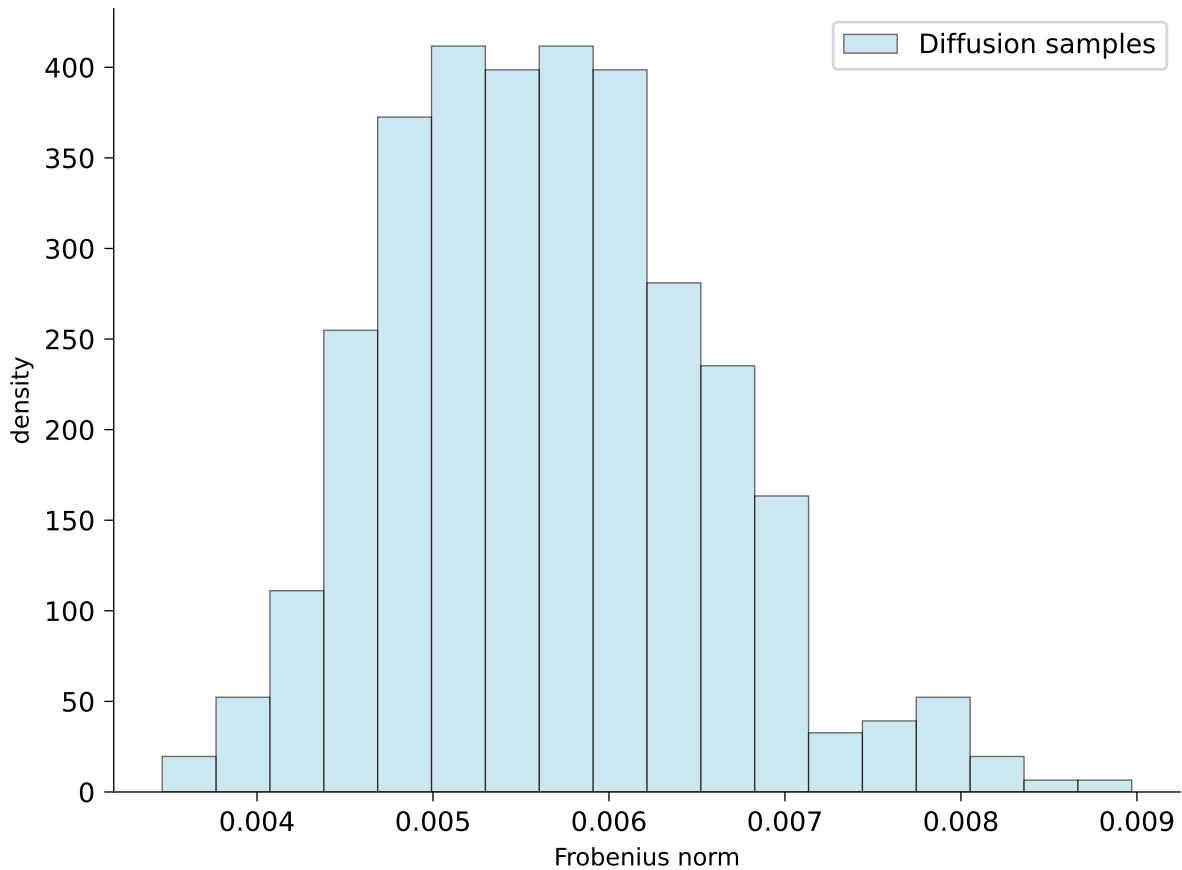

Supplement: supplementary_material [file histogram_1.pdf › SparseDiffusion-main/images/histogram_1.pdf]

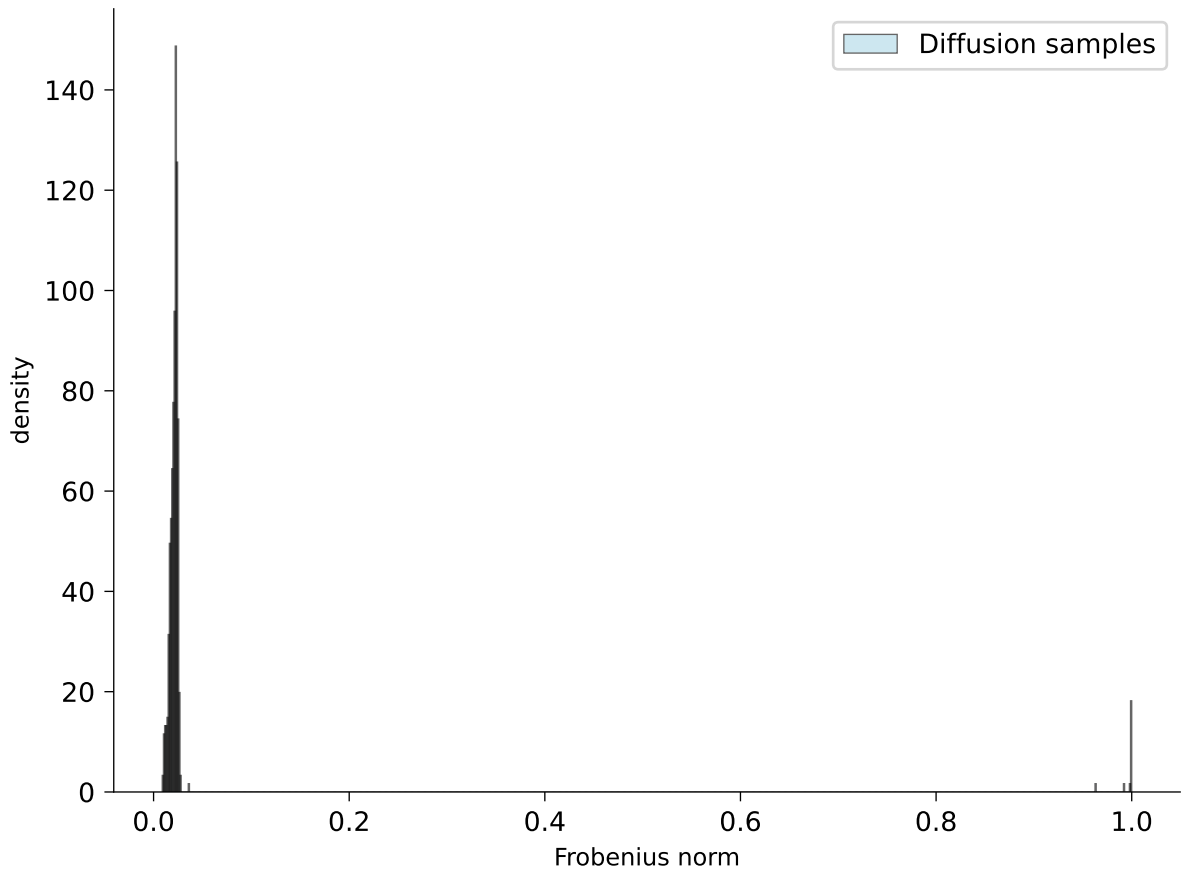

Supplement: supplementary_material [file histogram_2.pdf › SparseDiffusion-main/images/histogram_2.pdf]

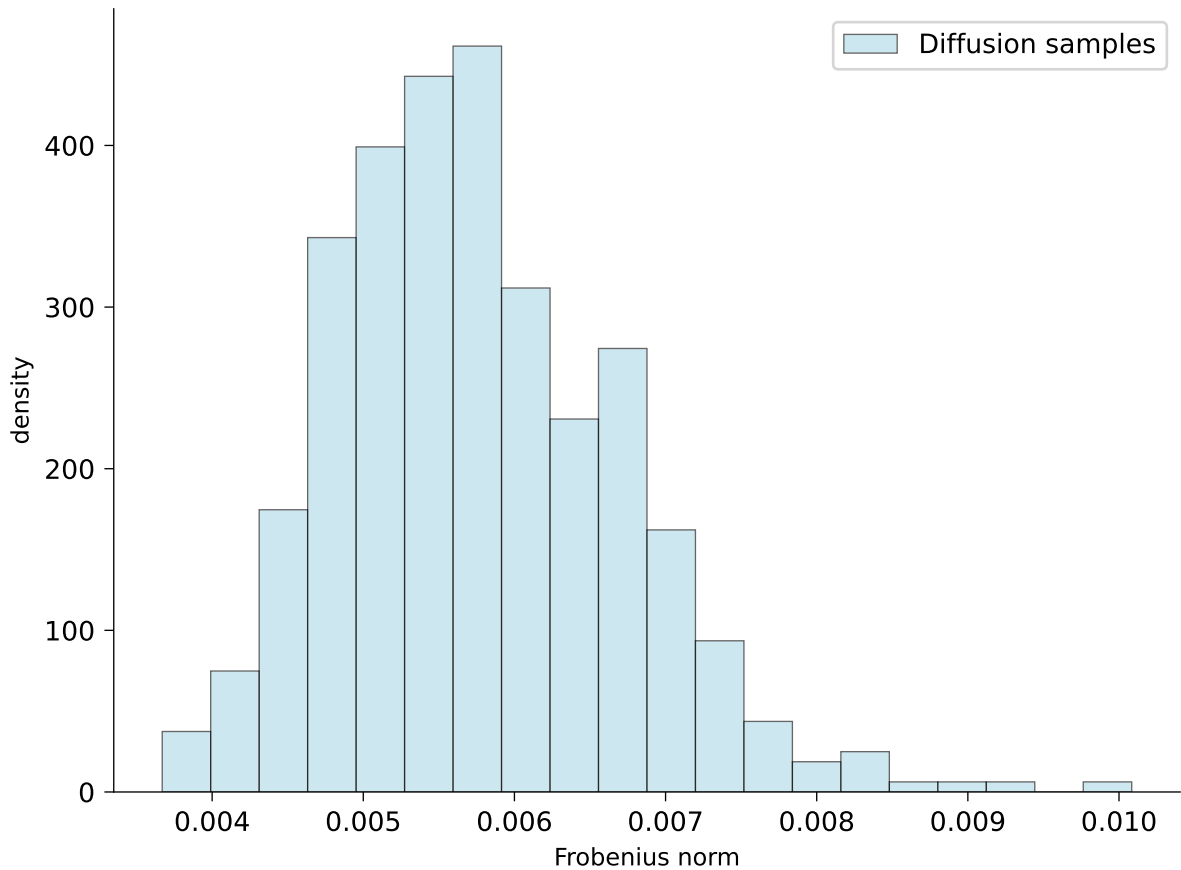

Supplement: supplementary_material [file n=350 histogram.pdf › SparseDiffusion-main/images/n=350 histogram.pdf]

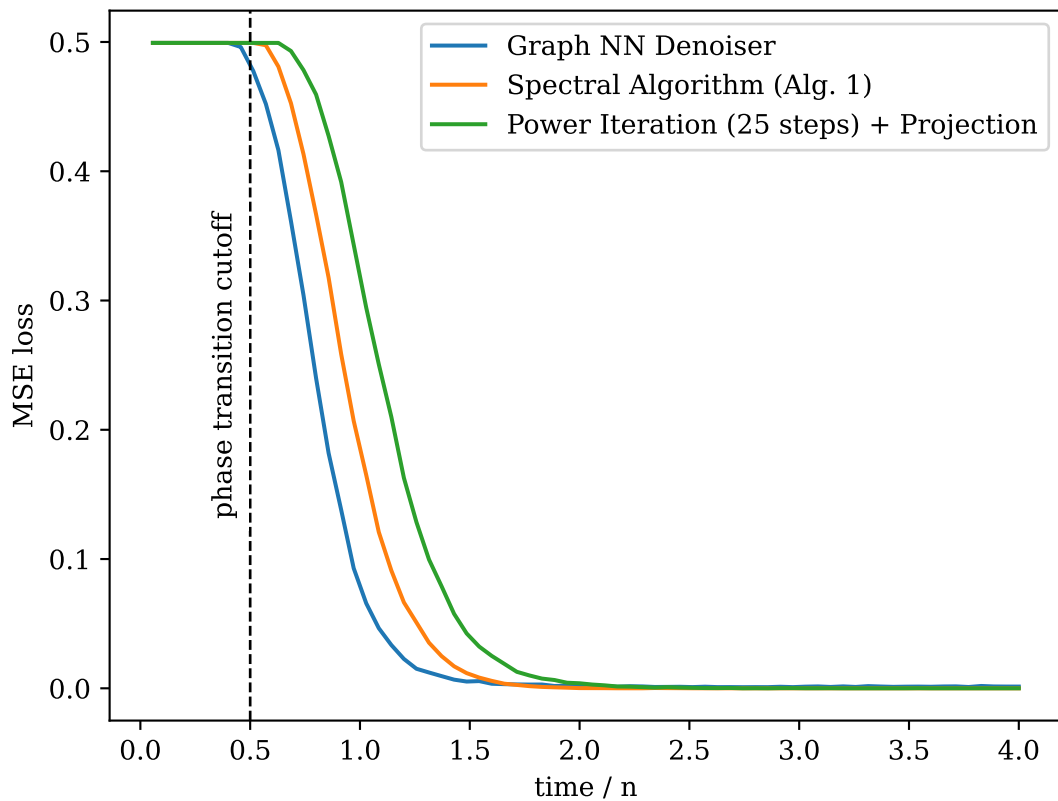

Supplement: supplementary_material [file n=350 plot.pdf › SparseDiffusion-main/images/n=350 plot.pdf]

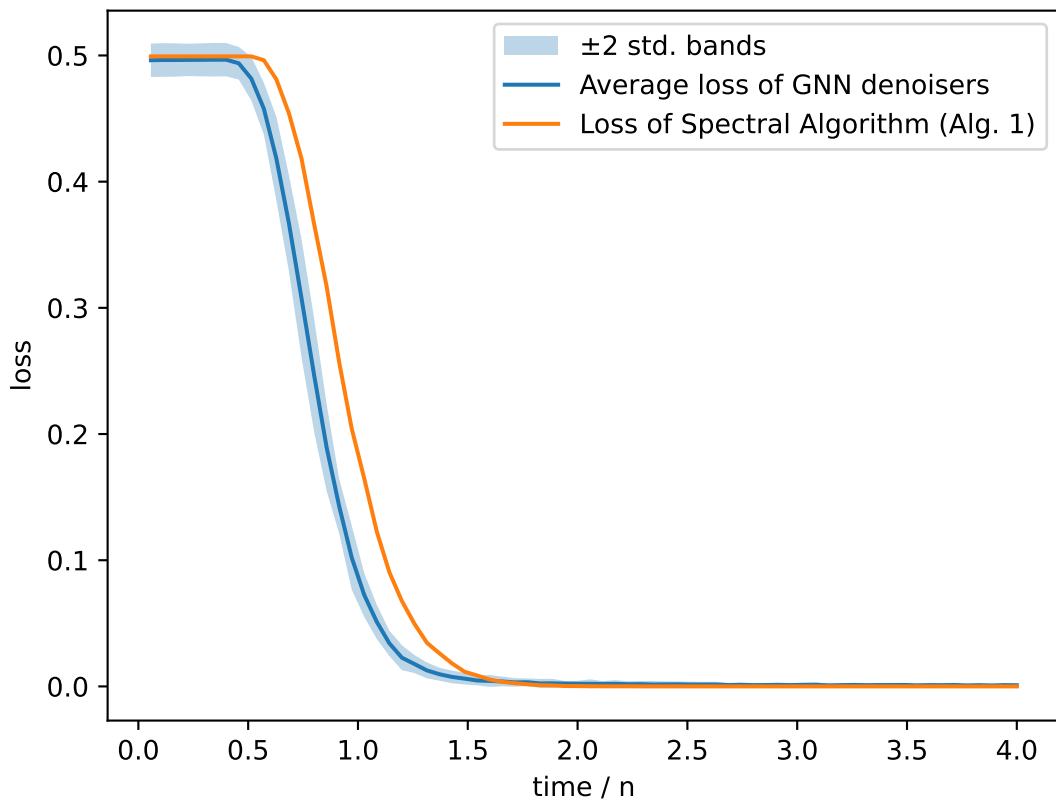

Supplement: supplementary_material [file robust_plot.pdf › SparseDiffusion-main/images/robust_plot.pdf]

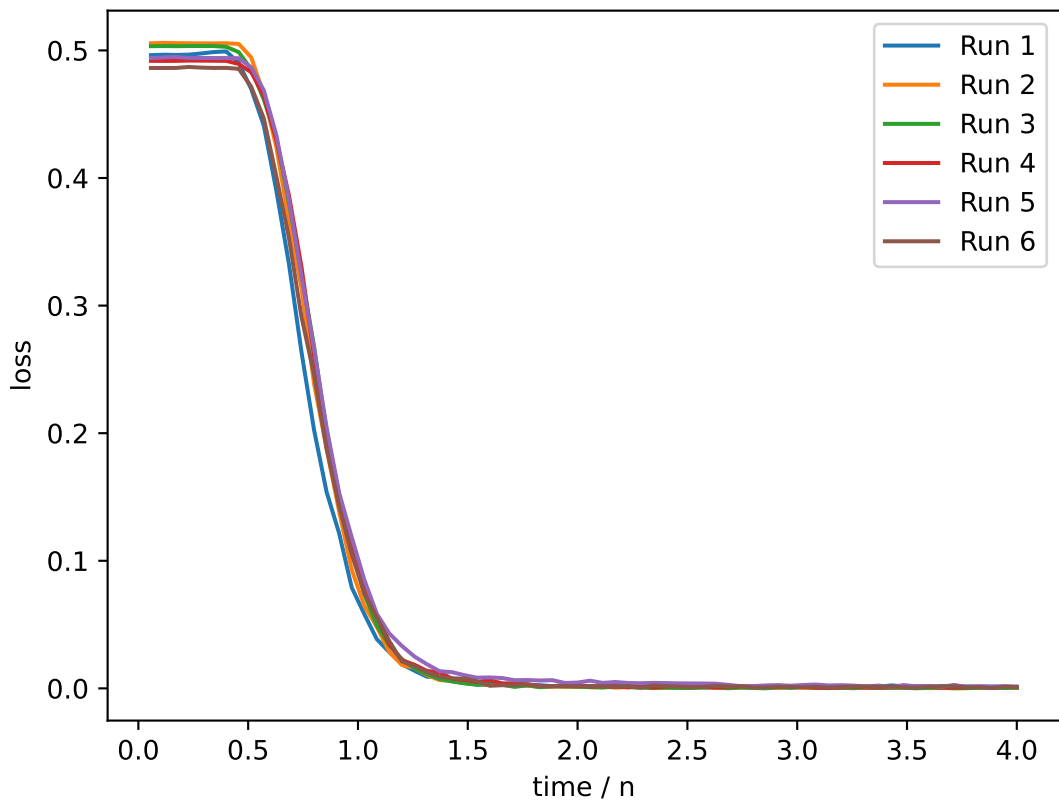

Supplement: supplementary_material [file run_plot.pdf › SparseDiffusion-main/images/run_plot.pdf]
